1 Biogeography & Environmental Conditions Shape Phage &  
2 Bacteria Interaction Networks Across the Human Microbiome

3 Geoffrey D Hannigan<sup>1</sup>, Melissa B Duhaime<sup>2</sup>, Danai Koutra<sup>3</sup>, and Patrick D Schloss<sup>1,\*</sup>

4 <sup>1</sup>Department of Microbiology & Immunology, University of Michigan, Ann Arbor, Michigan, 48109

5 <sup>2</sup>Department of Ecology & Evolutionary Biology, University of Michigan, Ann Arbor, Michigan, 48109

6 <sup>3</sup>Department of Computer Science, University of Michigan, Ann Arbor, Michigan, 48109

7 \*To whom correspondence may be addressed.

8  
9  
10  
11 **Running Title:** Network Diversity of the Healthy Human Microbiome

12 **Corresponding Author Information**

13 Patrick D Schloss, PhD

14 1150 W Medical Center Dr. 1526 MSRB I

15 Ann Arbor, Michigan 48109

16 Phone: (734) 647-5801

17 Email: pschloss@umich.edu

## 18 **Abstract**

19 Viruses and bacteria are critical components of the human microbiome and play important roles in health and  
20 disease. Most previous work has relied on studying microbes and viruses independently, thereby reducing  
21 them to two separate communities. Such approaches are unable to capture how these microbial communities  
22 interact, such as through processes that maintain community stability or allow phage-host populations to  
23 co-evolve. We developed and implemented a network-based analytical approach to describe phage-bacteria  
24 network diversity throughout the human body. We accomplished this by building a machine learning algorithm  
25 to predict which phages could infect which bacteria in a given microbiome. This algorithm was applied to  
26 paired viral and bacterial metagenomic sequence sets from three previously published human cohorts. We  
27 organized the predicted interactions into networks that allowed us to evaluate phage-bacteria connectedness  
28 across the human body. We found that gut and skin network structures were person-specific and not  
29 conserved among cohabitating family members. High-fat diets and obesity appeared to be associated with  
30 less connected networks. Network structure differed between skin sites, with those exposed to the external  
31 environment being less connected and more prone to instability. This study quantified and contrasted the  
32 diversity of virome-microbiome networks across the human body and illustrated how environmental factors  
33 may influence phage-bacteria interactive dynamics. This work provides a baseline for future studies to better  
34 understand system perturbations, such as disease states, through ecological networks.

## 35 **Importance**

36 The human microbiome, the collection of microbial communities that colonize the human body, is a crucial  
37 component to health and disease. Two major components to the human microbiome are the bacterial  
38 and viral communities. These communities have primarily been studied separately using metrics of  
39 community composition and diversity. These approaches have failed to capture the complex dynamics  
40 of interacting bacteria and phage communities, which frequently share genetic information and work  
41 together to maintain stable ecosystems. Removal of bacteria or phage can disrupt or even collapse those  
42 ecosystems. Relationship-based network approaches allow us to capture this interaction information. Using  
43 this network-based approach with three independent human cohorts, we were able to present an initial  
44 understanding of how phage-bacteria networks differ throughout the human body, so as to provide a baseline  
45 for future studies of how and why microbiome networks differ in disease states.

## 46 Introduction

47 Viruses and bacteria are critical components of the human microbiome and play important roles in health  
48 and disease. Bacterial communities have been associated with disease states, including a range of skin  
49 conditions (1), acute and chronic wound healing conditions (2, 3), and gastrointestinal diseases, such as  
50 inflammatory bowel disease (4, 5), *Clostridium difficile* infections (6) and colorectal cancer (7, 8). Altered  
51 human viromes (virus communities consisting primarily of bacteriophages) also have been associated with  
52 diseases and perturbations, including inflammatory bowel disease (5, 9), periodontal disease (10), spread  
53 of antibiotic resistance (11), and others (12–17). Viruses act in concert with their microbial hosts as a single  
54 ecological community (18). Viruses influence their living microbial host communities through processes  
55 including lysis, host gene expression modulation (19), influence on evolutionary processes such as horizontal  
56 gene transfer (22) or antagonistic co-evolution (26), and alteration of ecosystem processes and elemental  
57 stoichiometry (27).

58 Previous human microbiome work has focused on bacterial and viral communities, but have reduced them  
59 to two separate communities by studying them independently (5, 9, 10, 12–17). This approach fails to  
60 capture the complex dynamics of interacting bacteria and phage communities, which frequently share genetic  
61 information and work together to maintain stable ecosystems. Removal of bacteria or phages can disrupt or  
62 even collapse those ecosystems (18, 28–37). Relationship-based network approaches allow us to capture  
63 this interaction information. Studying such bacteria-phage interactions through community-wide networks  
64 built from inferred relationships could offer further insights into the drivers of human microbiome diversity  
65 across body sites and enable the study of human microbiome network dynamics overall.

66 In this study, we characterized human-associated bacterial and phage communities by their inferred  
67 relationships using three published paired virus and bacteria-dominated whole community metagenomic  
68 datasets (13, 14, 38, 39). We leveraged machine learning and graph theory techniques to establish  
69 and explore the human bacteria-phage network diversity therein. This approach built upon previous  
70 large-scale phage-bacteria network analyses by inferring interactions from metagenomic datasets, rather  
71 than culture-dependent data (33), which is limited in the scale of possible experiments and analyses.

72 Our metagenomic interaction inference model improved upon previous models of phage-host predictions  
73 that have utilized a variety of techniques, such as linear models to predict bacteria-phage co-occurrence  
74 using taxonomic assignments (40), and nucleotide similarity models that were applied to both whole virus  
75 genomes (41) and related clusters of whole and partial virus genomes (42). Our approach uniquely included  
76 protein interaction data and was validated based on experimentally determined positive and negative  
77 interactions (i.e. who does and does not infect whom). Through this approach we were able to provide a  
78 basic understanding of the network dynamics associated with phage and bacterial communities on and in  
79 the human body. By building and utilizing a microbiome network, we found that different people, body sites,  
80 and anatomical locations not only support distinct microbiome membership and diversity (13, 14, 38, 39,  
81 43–45), but also support ecological communities with distinct communication structures and propensities  
82 toward community instability. Through an improved understanding of network structures across the human  
83 body, we empower future studies to investigate how these communities dynamics are influenced by disease  
84 states and the overall impact they may have on human health.

## 85 **Results**

### 86 **Cohort Curation and Sample Processing**

87 We studied the differences in virus-bacteria interaction networks across healthy human bodies by leveraging  
88 previously published shotgun sequence datasets of purified viral metagenomes (viromes) paired with  
89 bacteria-dominated whole community metagenomes. Our study contained three datasets that explored  
90 the impact of diet on the healthy human gut virome (14), the impact of anatomical location on the healthy  
91 human skin virome (13), and the viromes of monozygotic twins and their mothers (38, 39). We selected  
92 these datasets because their virome samples were subjected to virus-like particle (VLP) purification,  
93 which removed contaminating DNA from human cells, bacteria, etc. To this end, the publishing authors  
94 employed combinations of filtration, chloroform/DNase treatment, and cesium chloride gradients to eliminate  
95 organismal DNA (e.g. bacteria, human, fungi, etc) and thereby allow for direct assessment of both the

96 extracellular and fully-assembled intracellular virome (**Supplemental Figure S1 A-B**) (14, 39). Each  
97 research group reported quality control measures to ensure the purity of the virome sequence datasets,  
98 using both computational and molecular techniques (e.g. 16S rRNA gene qPCR) (**Table S1**). These reports  
99 confirmed that the virome libraries consisted of highly purified virus genomic DNA.

100 The bacterial and viral sequences from these studies were quality filtered and assembled into contigs. We  
101 further grouped the related bacterial and phage contigs into operationally defined units based on their k-mer  
102 frequencies and co-abundance patterns, similar to previous reports (**Supplemental Figure S2 - S3**) (42). We  
103 referred to these operationally defined groups of related contigs as operational genomic units (OGUs). Each  
104 OGU represented a genomically similar sub-population of either bacteria or phages. Contig lengths within  
105 clusters ranged between  $10^3$  and  $10^{5.5}$  bp (**Supplemental Figure S2 - S3**).

106 While supplementing the previous quality control measures (**Table S1**) we found that, in light of the rigorous  
107 purification and quality control during sample collection and preparation, 77% (228 / 298 operational  
108 genomic units) still had some nucleotide similarity to a given bacterial reference genome (e-value  $< 10^{-25}$ ).  
109 As absence of bacterial contamination had been confirmed by sensitive molecular methods (**Table S1**),  
110 we interpreted this as evidence that the majority of the gut and skin bacteriophages were temperate and  
111 thereby shared elements with bacterial reference genomes that contained similar integrated phages when  
112 sequenced—a trend previously reported (14). Additionally, we identified two OGUs as being complete  
113 phages using the stringent Virsorter phage identification algorithm (class 1 confidence group) (47).

114 The whole metagenomic shotgun sequence samples primarily consisted of bacteria, with an average viral  
115 relative abundance of 0.4% (**Table S1**) (13, 14, 38, 39). We found that only 2% (6 / 280 OGUs) of bacterial  
116 OGUs had significantly strong nucleotide similarity to phage reference genomes (e-value  $< 10^{-25}$ ) (13, 14,  
117 38, 39). No OGUs were confidently identified as lytic or temperate phage OGUs in the bacterial dataset using  
118 the Virsorter algorithm (47). Together this suggests only minimal “contamination” of the bacterial OGUs.

## 119 **Evaluating the Model to Predict Phage-Bacteria Interactions**

120 We predicted which phage OGUs infected which bacterial OGUs using a random forest model trained on  
121 experimentally validated infectious relationships from six previous publications (41, 48–52). Only bacteria  
122 and phages were used in the model. The training set contained 43 diverse bacterial species and 30 diverse  
123 phage strains, including both broad and specific ranges of infection (**Supplemental Figure S4 A - B**). While  
124 it is true that there are more known phages that infect bacteria, we were limited by the information confirming  
125 which phages do not infect certain bacteria and attempted to keep the numbers of positive and negative  
126 interactions similar. Phages with linear and circular genomes, as well as ssDNA and dsDNA genomes, were  
127 included in the analysis. Because we used DNA sequencing studies, RNA phages were not considered  
128 (**Supplemental Figure S4 C-D**). This training set included both positive relationships (a phage infects a  
129 bacterium) and negative relationships (a phage does not infect a bacterium). This allowed us to validate the  
130 false positive and false negative rates associated with our candidate models, thereby building upon previous  
131 work that only considered positive relationships (41).

132 Four phage and bacterial genomic features were used in a random forest model to predict infectious  
133 relationships between bacteria and phages: 1) genome nucleotide similarities, 2) gene amino acid  
134 sequence similarities, 3) bacterial Clustered Regularly Interspaced Short Palindromic Repeat (CRISPR)  
135 spacer sequences that target phages, and 4) similarity of protein families associated with experimentally  
136 identified protein-protein interactions (53). The resulting random forest model was assessed using nested  
137 cross validation, and the median area under its receiver operating characteristic (ROC) curve was 0.788,  
138 the median model sensitivity was 0.952, and median specificity was 0.615 (**Figure 1 A**). The most important  
139 predictor in the model was amino acid similarity between genes, followed by nucleotide similarity of whole  
140 genomes (**Figure 1 B**). Protein family interactions were moderately important to the model, and CRISPRs  
141 were largely uninformative, due to the minimal amount of identifiable CRISPRs in the dataset and their  
142 redundancy with the nucleotide similarity methods (**Figure 1 B**). Approximately one third of the training set  
143 relationships yielded no score and therefore were unable to be assigned an interaction prediction (**Figure 1**  
144 **C**).

145 We used our random forest model to classify the relationships between bacteria and phage operational  
146 genomic units, which were then used to build the interactive network. The master network contained the  
147 three studies as sub-networks, which themselves each contained sub-networks for each sample (**Figure 1 D**).  
148 Metadata including study, sample ID, disease, and OGU abundance within the community were stored in the  
149 master network for parsing in downstream analyses (**Supplemental Figure S5**). Bacterial and phage relative  
150 abundance was recorded in each sample for each OGU and the weight of the edge connecting those OGUs  
151 was calculated as a function of those relative abundance values. The separate extraction of the phage and  
152 bacterial libraries ensured a more accurate measurement of the microbial communities, as has been outlined  
153 previously (54, 55). The master network was highly connected and contained 72,287 infectious relationships  
154 among 578 nodes, representing 298 phages and 280 bacteria. Although the network was highly connected,  
155 not all relationships were present in all samples. Relationships were weighted by the relative abundances  
156 of their associated bacteria and phages. Like the master network, the skin network exhibited a diameter  
157 of 4 (measure of graph size; the greatest number of traversed vertices required between two vertices) and  
158 included 576 (297 phages, 279 bacteria, 99.7% total) and 72,127 (99.8%) of the master network nodes and  
159 edges, respectively (**Figure 1 E - F**). The phages and bacteria in the diet and twin sample sets were more  
160 sparsely related, with the diet study consisting of 89 (41 phages, 48 bacteria) nodes and 5,566 relationships,  
161 and the twin study containing 137 (36 phages, 101 bacteria) nodes and 17,250 relationships (**Figure 1 E -**  
162 **F**).

## 163 **Role of Diet & Obesity in Gut Microbiome Connectivity**

164 Diet is a major environmental factor that influences resource availability and gut microbiome composition and  
165 diversity, including bacteria and phages (14, 56, 57). Previous work in isolated culture-based systems has  
166 suggested that changes in nutrient availability are associated with altered phage-bacteria network structures  
167 (30), although this has yet to be tested in humans. We therefore hypothesized that a change in diet would  
168 also be associated with a change in virome-microbiome network structure in the human gut.

169 We evaluated the diet-associated differences in gut virome-microbiome network structure by quantifying how



170 central each sample's network was on average. We accomplished this by utilizing two common centrality  
171 metrics: degree centrality and closeness centrality. Degree centrality, the simplest centrality metric,  
172 was defined as the number of connections each phage made with each bacterium. We supplemented  
173 measurements of degree centrality with measurements of closeness centrality. Closeness centrality is a  
174 metric of how close each phage or bacterium is to all of the other phages and bacteria in the network. A  
175 higher closeness centrality suggests that the effects of genetic information or altered abundance would be  
176 more impactful to all other microbes in the system. A network with higher average closeness centrality also  
177 indicates an overall greater degree of connections, which suggests a greater resilience against instability.  
178 This is because more highly connected networks are more stable as a result of pathway dependencies and  
179 the unlikelihood that a randomly removed bacteria or phage would cause major divisions across the network  
180 (30, 58). We used this information to calculate the average connectedness per sample, which was corrected  
181 for the maximum potential degree of connectedness. Unfortunately our dataset was insufficiently powered  
182 to make strong conclusions toward this hypothesis, but this is an interesting observation that warrants further  
183 investigation.

184 Using our limited sample set, we observed that the gut microbiome network structures associated with high-fat  
185 diets appeared less connected than those of low-fat diets, although a greater sample size will be required  
186 to more properly evaluate this trend (**Figure 2 A-B**). Five subjects were available for use, all of which had  
187 matching bacteria and virome datasets and samples from 8-10 days following the initiation of their diets.  
188 High-fat diets appeared to exhibit reduced degree centrality (**Figure 2 A**), suggesting bacteria in high-fat  
189 environments were targeted by fewer phages and that phage tropism was more restricted. High-fat diets  
190 also appeared to exhibit decreased closeness centrality (**Figure 2 B**), indicating that bacteria and phages  
191 were more distant from other bacteria and phages in the community. This would make genetic transfer and  
192 altered abundance of a given phage or bacterium less capable of impacting other bacteria and phages within  
193 the network.

194 In addition to diet, we found preliminary evidence that obesity influenced network structure. This was done  
195 using the three mother samples available from the twin sample set, all of which had matching bacteria

196 and phage samples and confirmed BMI information. The obesity-associated network appeared to have a  
197 higher degree centrality (**Figure 2 C**), but less closeness centrality than the healthy-associated networks  
198 (**Figure 2 D**). These results suggested that the obesity-associated networks are less connected, having  
199 microbes further from all other microbes within the community. This again comes with the caveat that this is  
200 a preliminary observation with too small of a sample size to make more substantial claims.

## 201 **Individuality of Microbial Networks**

202 Skin and gut community membership and diversity are highly personal, with people remaining more similar  
203 to themselves than to other people over time (13, 59, 60). We therefore hypothesized that this personal  
204 conservation extended to microbiome network structure. We addressed this hypothesis by calculating  
205 the degree of dissimilarity between each subject's network, based on phage and bacteria abundance  
206 and centrality. We quantified phage and bacteria centrality within each sample graph using the weighted  
207 eigenvector centrality metric. This metric defines central phages as those that are highly abundant ( $A_O$  as  
208 defined in the methods) and infect many distinct bacteria which themselves are abundant and infected by  
209 many other phages. Similarly, bacterial centrality was defined as those bacteria that were both abundant and  
210 connected to numerous phages that were themselves connected to many bacteria. We then calculated the  
211 similarity of community networks using the weighted eigenvector centrality of all nodes between all samples.  
212 Samples with similar network structures were interpreted as having similar capacities for maintaining stability  
213 and transmitting genetic material.

214 We used this network dissimilarity metric to test whether microbiome network structures were more similar  
215 within people than between people over time. We found that gut microbiome network structures clustered by  
216 person (ANOSIM p-value = 0.005, R = 0.958, **Figure 3 A**). Network dissimilarity within each person over the  
217 8-10 day sampling period was less than the average dissimilarity between that person and others, although  
218 this difference was not statistically significant (p-value = 0.125, **Figure 3 B**). Four of the five available subjects  
219 were used because one of the subjects was not sampled at the initial time point. The lack of statistical  
220 confidence was likely due to the small sample size of this dataset.

221 Although there was evidence for gut network conservation among individuals, we found no evidence for  
222 conservation of gut network structures within families. The gut network structures were not more similar  
223 within families (twins and their mothers; intrafamily) compared to other families (other twins and mothers;  
224 inter-family) ( $p$ -value = 0.312, **Figure 3 C**). In addition to the gut, skin microbiome network structure was  
225 strongly conserved within individuals ( $p$ -value < 0.001, **Figure 3 D**). This distribution was similar when  
226 separated by anatomical sites. Most sites were statistically significantly more conserved within individuals  
227 (**Supplemental Figure S6**).

## 228 **Association Between Environmental Stability and Network Structure Across the** 229 **Human Skin Landscape**

230 Extensive work has illustrated differences in diversity and composition of the healthy human skin microbiome  
231 between anatomical sites, including bacteria, virus, and fungal communities (13, 44, 59). These communities  
232 vary by degree of skin moisture, oil, and environmental exposure. As viruses are known to influence microbial  
233 diversity and community composition, we hypothesized that microbe-virus network structure would be specific  
234 to anatomical sites, as well. To test this, we evaluated the changes in network structure between anatomical  
235 sites within the skin dataset.

236 The average centrality of each sample was quantified using the weighted eigenvector centrality metric.  
237 Intermittently moist skin sites (dynamic sites that fluctuate between being moist and dry) were significantly  
238 less connected than the more stable moist and sebaceous environments ( $p$ -value < 0.001, **Figure 4 A**). Also,  
239 skin sites that were occluded from the environment were much more highly connected than those that were  
240 constantly exposed to the environment or only intermittently occluded ( $p$ -value < 0.001, **Figure 4 B**).

241 To supplement this analysis, we compared the network signatures using the centrality dissimilarity approach  
242 described above. The dissimilarity between samples was a function of shared relationships, degree of  
243 centrality, and bacteria/phage abundance. When using this supplementary approach, we found that network  
244 structures significantly clustered by moisture, sebaceous, and intermittently moist status (**Figure 4 C,E**).

245 Occluded sites were significantly different from exposed and intermittently occluded sites, but there was no  
246 difference between exposed and intermittently occluded sites (**Figure 4 D,F**). These findings provide further  
247 support that skin microbiome network structure differs significantly between skin sites.

## 248 Discussion

249 Foundational work has provided a baseline understanding of the human microbiome by characterizing  
250 bacterial and viral diversity across the human body (13, 14, 43–45, 61). Here, we offer an initial  
251 understanding of how phage-bacteria networks differ throughout the human body, so as to provide a  
252 baseline for future studies of how and why microbiome networks differ in disease states. We developed and  
253 implemented a network-based analytical model to evaluate the basic properties of the human microbiome  
254 through bacteria and phage relationships, instead of membership or diversity alone. This enabled the  
255 application of network theory to provide a new perspective on complex ecological communities. We utilized  
256 metrics of connectivity to model the extent to which communities of bacteria and phages interact through  
257 mechanisms such as horizontal gene transfer, modulated bacterial gene expression, and alterations in  
258 abundance.

259 Just as gut microbiome and virome composition and diversity are conserved in individuals (13, 43, 44, 60), gut  
260 and skin microbiome network structures were conserved within individuals over time. Gut network structure  
261 was not conserved among family members. These findings suggested that the community properties inferred  
262 from microbiome interaction network structures, such as stability (meaning a more highly connected network  
263 is more stable because a randomly removed bacteria or phage node is less likely to divide or disintegrate  
264 (30, 58) the overall network), the potential for horizontal gene transfer between members, and co-evolution  
265 of populations, were person-specific. These properties may be impacted by personal factors ranging from  
266 the body's immune system to external environmental conditions, such as climate and diet.

267 We observed evidence supporting the ability of environmental conditions to shape gut and skin microbiome  
268 interaction network structure by observing that diet and skin location were associated with altered network

269 structures. We found evidence that diet was sufficient to alter gut microbiome network connectivity, although  
270 this needs to be interpreted as a case observation, due to the small sample size. Although our sample size  
271 was small, our findings provided some preliminary evidence that high-fat diets were less connected than  
272 low-fat diets and that high-fat diets therefore may lead to less stable communities with a decreased ability for  
273 microbes to directly influence one another. We supported this finding with the observation that obesity may  
274 have been associated with decreased network connectivity. Together these findings suggest the food we eat  
275 may not only impact which microbes colonize our guts, but may also impact their interactions with infecting  
276 phages. Further work will be required to characterize these relationships with a larger cohort.

277 In addition to diet, the skin environment also influenced the microbiome interaction network structure.  
278 Network structure differed between environmentally exposed and occluded skin sites. The sites under  
279 greater environmental fluctuation and exposure (the exposed and intermittently exposed sites) were less  
280 connected and therefore were predicted to have a higher propensity for instability. Likewise, intermittently  
281 moist sites demonstrated less connectedness than the more stable moist and sebaceous sites. Together  
282 these data suggested that body sites under greater degrees of fluctuation harbored less connected,  
283 potentially less stable microbiomes. This points to a link between microbiome and environmental stability  
284 and warrants further investigation.

285 While these findings take us an important step closer to understanding the microbiome through interspecies  
286 relationships, there are caveats to and considerations regarding the approach. First, as with most  
287 classification models, the infection classification model developed and applied is only as good as its training  
288 set – in this case, the collection of experimentally-verified positive and negative infection data, where  
289 genomes of all members are fully sequenced. Large-scale experimental screens for phage and bacteria  
290 infectious interactions that report high-confidence negative interactions (i.e., no infection) are desperately  
291 needed, as they would provide more robust model training and improved model performance. Furthermore,  
292 just as we have improved on previous modeling efforts, we expect that new and creative scoring metrics will  
293 be integrated into this model to improve future performance.

294 Second, although our analyses utilized the best datasets currently available for our study, this work was done

295 retrospectively and relied on existing data up to seven years old. These archived datasets were limited by  
296 the technology and costs of the time. For example, the diet and twin studies, relied on multiple displacement  
297 amplification (MDA) in their library preparations—an approach used to overcome the large nucleic acids  
298 requirements typical of older sequencing library generation protocols. It is now known that MDA results  
299 in biases in microbial community composition (62), as well as toward ssDNA viral genomes (63, 64), thus  
300 rendering the resulting microbial and viral metagenomes largely non-quantitative. Future work that employs  
301 larger sequence datasets and that avoids the use of bias-inducing amplification steps will build on and validate  
302 our findings, as well as inform the design and interpretation of further studies.

303 Finally, the networks in this study were built using operational genomic units (OGUs), which represented  
304 groups of highly similar bacteria or phage genomes or clustered genome fragments. Similar clustering  
305 definition and validation methods, both computational and experimental, have been implemented in other  
306 metagenomic sequencing studies, as well (42, 65–67). These approaches could offer yet another level of  
307 sophistication to our network-based analyses. While this operationally defined clustering approach allows  
308 us to study whole community networks, our ability to make conclusions about interactions among specific  
309 phage or bacterial species or populations is inherently limited, compared to more focused, culture-based  
310 studies such as the work by Malki *et al* (68). Future work must address this limitation, e.g., through improved  
311 binning methods and deeper metagenomic shotgun sequencing, but most importantly through an improved  
312 conceptual framing of what defines ecologically and evolutionarily cohesive units for both phage and bacteria  
313 (69). Defining operational genomic units and their taxonomic underpinnings (e.g., whether OGU clusters  
314 represent genera or species) is an active area of work critical to the utility of this approach. As a first  
315 step, phylogenomic analyses have been performed to cluster cyanophage isolate genomes into informative  
316 groups using shared gene content, average nucleotide identity of shared genes, and pairwise differences  
317 between genomes (70). Such population-genetic assessment of phage evolution, coupled with the ecological  
318 implications of genome heterogeneity, will inform how to define nodes in future iterations of the ecological  
319 network developed here. Even though we are hesitant to speculate on phage host ranges at low taxonomic  
320 levels in our dataset, the data does agree with previous reports of instances of broad phage host range (68,  
321 71).

322 Together our work takes an initial step towards defining bacteria-virus interaction profiles as a characteristic  
323 of human-associated microbial communities. This approach revealed the impacts that different human  
324 environments (e.g., the skin and gut) can have on microbiome connectivity. By focusing on relationships  
325 between bacterial and viral communities, they are studied as the interacting cohorts they are, rather than  
326 as independent entities. While our developed bacteria-phage interaction framework is a novel conceptual  
327 advance, the microbiome also consists of archaea and small eukaryotes, including fungi and *Demodex* mites  
328 (1, 72)—all of which can interact with human immune cells and other non-microbial community members (73).  
329 Future work will build from our approach and include these additional community members and their diverse  
330 interactions and relationships (e.g., beyond phage-bacteria). This will result in a more robust network and a  
331 more holistic understanding of the evolutionary and ecological processes that drive the assembly and function  
332 of the human-associated microbiome.

## 333 **Materials & Methods**

### 334 **Code Availability**

335 A reproducible version of this manuscript written in R markdown and all of the code used to obtain and  
336 process the sequencing data is available at the following GitHub repository:

337 [https://github.com/SchlossLab/Hannigan\\_ConjunctisViribus\\_mSystems\\_2017](https://github.com/SchlossLab/Hannigan_ConjunctisViribus_mSystems_2017)

### 338 **Data Acquisition & Quality Control**

339 Raw sequencing data and associated metadata were acquired from the NCBI sequence read archive (SRA).  
340 Supplementary metadata were acquired from the same SRA repositories and their associated manuscripts.  
341 The gut virome diet study (SRA: SRP002424), twin virome studies (SRA: SRP002523; SRP000319), and  
342 skin virome study (SRA: SRP049645) were downloaded as .sra files. Sequencing files were converted  
343 to fastq format using the `fastq-dump` tool of the NCBI SRA Toolkit (v2.2.0). Sequences were quality

344 trimmed using the Fastx toolkit (v0.0.14) to exclude bases with quality scores below 33 and shorter than 75  
345 bp (74). Paired end reads were filtered to exclude sequences missing their corresponding pair using the  
346 `get_trimmed_pairs.py` script available in the source code.

## 347 **Contig Assembly**

348 Contigs were assembled using the Megahit assembly program (v1.0.6) (75). A minimum contig length of 1  
349 kb was used. Iterative k-mer stepping began at a minimum length of 21 and progressed by 20 until 101. All  
350 other default parameters were used.

## 351 **Contig Abundance Calculations**

352 Contigs were concatenated into two master files prior to alignment, one for bacterial contigs and one for  
353 phage contigs. Sample sequences were aligned to phage or bacterial contigs using the Bowtie2 global aligner  
354 (v2.2.1) (76). We defined a mismatch threshold of 1 bp and seed length of 25 bp. Sequence abundance was  
355 calculated from the Bowtie2 output using the `calculate_abundance_from_sam.pl` script available in  
356 the source code.

## 357 **Operational Genomic Unit Binning**

358 Contigs often represent large fragments of genomes. In order to reduce redundancy and the resulting  
359 artificially inflated genomic richness within our dataset, it was important to bin contigs into operational  
360 units based on their similarity. This approach is conceptually similar to the clustering of related 16S rRNA  
361 sequences into operational taxonomic units (OTUs), although here we are clustering contigs into operational  
362 genomic units (OGUs) (61).

363 Contigs were clustered using the CONCOCT algorithm (v0.4.0) (77). Because of our large dataset and limits  
364 in computational efficiency, we randomly subsampled the dataset to include 25% of all samples, and used



365 these to inform contig abundance within the CONCOCT algorithm. CONCOCT was used with a maximum  
366 of 500 clusters, a k-mer length of four, a length threshold of 1 kb, 25 iterations, and exclusion of the total  
367 coverage variable.

368 OGU abundance ( $A_O$ ) was obtained as the sum of the abundance of each contig ( $A_j$ ) associated with that  
369 OGU. The abundance values were length corrected such that:

$$A_O = \frac{10^7 \sum_{j=1}^k A_j}{\sum_{j=1}^k L_j}$$

370 Where L is the length of each contig j within the OGU.

## 371 **Operational Genomic Unit Identification**

372 To confirm a lack of phage sequences in the bacterial OGU dataset, we performed blast nucleotide alignment  
373 of the bacterial OGU representative sequences using an e-value  $< 10^{-25}$ , which was stricter than the  $10^{-10}$   
374 threshold used in the random forest model below, against all of the phage reference genomes available in  
375 the EMBL database. We used a stricter threshold because we know there are genomic similarities between  
376 bacteria and phage OGUs from the interactive model, but we were interested in contigs with high enough  
377 similarity to references that they may indeed be from phages. We also performed the converse analysis  
378 of aligning phage OGU representative sequences to EMBL bacterial reference genomes. Finally, we ran  
379 both the phage and bacteria OGU representative sequences through the Virsorter program (1.0.3) to identify  
380 phages (all default parameters were used), using only those in the high confidence identification category  
381 “class 1” (47).

## 382 **Open Reading Frame Prediction**

383 Open reading frames (ORFs) were identified using the Prodigal program (V2.6.2) with the meta mode  
384 parameter and default settings (78).

## 385 **Classification Model Creation and Validation**

386 The classification model for predicting interactions was built using experimentally validated bacteria-phage  
387 infections or validated lack of infections from six studies (41, 48–52). Associated reference genomes were  
388 downloaded from the European Bioinformatics Institute (see details in source code). The model was created  
389 based on the four metrics listed below.

390 The four scores were used as parameters in a random forest model to classify bacteria and bacteriophage  
391 pairs as either having infectious interactions or not. The classification model was built using the Caret  
392 R package (v6.0.73) (79). The model was trained using five-fold cross validation with ten repeats, and  
393 the median model performance was evaluated by training the model on 80% of the dataset and testing  
394 performance on the remaining 20%. Pairs without scores were classified as not interacting. The model was  
395 optimized using the ROC value. The resulting model performance was plotted using the plotROC R package.

## 396 **Identify Bacterial CRISPRs Targeting Phages**

397 Clustered Regularly Interspaced Short Palindromic Repeats (CRISPRs) were identified from bacterial  
398 genomes using the PilerCR program (v1.06) (80). Resulting spacer sequences were filtered to exclude  
399 spacers shorter than 20 bp and longer than 65 bp. Spacer sequences were aligned to the phage genomes  
400 using the nucleotide BLAST algorithm with default parameters (v2.4.0) (81). The mean percent identity for  
401 each matching pair was recorded for use in our classification model.

## 402 **Detect Matching Prophages within Bacterial Genomes**

403 Temperate bacteriophages infect and integrate into their bacterial host's genome. We detected integrated  
404 phage elements within bacterial genomes by aligning phage genomes to bacterial genomes using the  
405 nucleotide BLAST algorithm and a minimum e-value of  $1e-10$ . The resulting bitscore of each alignment was  
406 recorded for use in our classification model.

## 407 **Identify Shared Genes Between Bacteria and Phages**

408 As a result of gene transfer or phage genome integration during infection, phages may share genes with  
409 their bacterial hosts, providing us with evidence of phage-host pairing. We identified shared genes between  
410 bacterial and phage genomes by assessing amino acid similarity between the genes using the Diamond  
411 protein alignment algorithm (v0.7.11.60) (82). The mean alignment bitscores for each genome pair were  
412 recorded for use in our classification model.

### 413 **Protein - Protein Interactions**

414 The final method used for predicting infectious interactions between bacteria and phages was the detection  
415 of pairs of genes whose proteins are known to interact. We assigned bacterial and phage genes to protein  
416 families by aligning them to the Pfam database using the Diamond protein alignment algorithm. We then  
417 identified which pairs of proteins were predicted to interact using the Pfam interaction information within the  
418 Intact database (53). The mean bitscores of the matches between each pair were recorded for use in the  
419 classification model.

### 420 **Interaction Network Construction**

421 The bacteria and phage operational genomic units (OGUs) were scored using the same approach as outlined  
422 above. The infectious pairings between bacteria and phage OGUs were classified using the random forest  
423 model described above. The predicted infectious pairings and all associated metadata were used to populate  
424 a graph database using Neo4j graph database software (v2.3.1) (83). This network was used for downstream  
425 community analysis.

### 426 **Centrality Analysis**

427 We quantified the centrality of graph vertices using three different metrics, each of which provided different  
428 information graph structure. When calculating these values, let  $G(V, E)$  be an undirected, unweighted graph  
429 with  $|V| = n$  nodes and  $|E| = m$  edges. Also, let  $\mathbf{A}$  be its corresponding adjacency matrix with entries

430  $a_{ij} = 1$  if nodes  $V_i$  and  $V_j$  are connected via an edge, and  $a_{ij} = 0$  otherwise.

431 Briefly, the **closeness centrality** of node  $V_i$  is calculated taking the inverse of the average length of the  
432 shortest paths ( $d$ ) between nodes  $V_i$  and all the other nodes  $V_j$ . Mathematically, the closeness centrality of  
433 node  $V_i$  is given as:

$$C_C(V_i) = \left( \sum_{j=1}^n d(V_i, V_j) \right)^{-1}$$

434 The distance between nodes ( $d$ ) was calculated as the shortest number of edges required to be traversed  
435 to move from one node to another.

436 Intuitively, the **degree centrality** of node  $V_i$  is defined as the number of edges that are incident to that node:

$$C_D(V_i) = \sum_{j=1}^n a_{ij}$$

437 where  $a_{ij}$  is the  $ij^{th}$  entry in the adjacency matrix  $\mathbf{A}$ .

438 The eigenvector centrality of node  $V_i$  is defined as the  $i^{th}$  value in the first eigenvector of the associated  
439 adjacency matrix  $\mathbf{A}$ . Conceptually, this function results in a centrality value that reflects the connections of  
440 the vertex, as well as the centrality of its neighboring vertices.

441 The **centralization** metric was used to assess the average centrality of each sample graph  $G$ . Centralization  
442 was calculated by taking the sum of each vertex  $V_i$ 's centrality from the graph maximum centrality  $C_w$ , such  
443 that:

$$C(G) = \frac{\sum_{i=1}^n C_w - c(V_i)}{T}$$

444 The values were corrected for uneven graph sizes by dividing the centralization score by the maximum  
445 theoretical centralization ( $T$ ) for a graph with the same number of vertices.

446 Degree and closeness centrality were calculated using the associated functions within the igraph R package  
447 (v1.0.1) (84).

## 448 **Network Relationship Dissimilarity**

449 We assessed similarity between graphs by evaluating the shared centrality of their vertices, as has been  
450 done previously. More specifically, we calculated the dissimilarity between graphs  $G_i$  and  $G_j$  using the  
451 Bray-Curtis dissimilarity metric and eigenvector centrality values such that:

$$B(G_i, G_j) = 1 - \frac{2C_{ij}}{C_i + C_j}$$

452 Where  $C_{ij}$  is the sum of the lesser centrality values for those vertices shared between graphs, and  $C_i$  and  
453  $C_j$  are the total number of vertices found in each graph. This allows us to calculate the dissimilarity between  
454 graphs based on the shared centrality values between the two graphs.

## 455 **Statistics and Comparisons**

456 Differences in intrapersonal and interpersonal network structure diversity, based on multivariate data,  
457 were calculated using an analysis of similarity (ANOSIM). Statistical significance of univariate Eigenvector  
458 centrality differences were calculated using a paired Wilcoxon test.

459 Statistical significance of differences in univariate eigenvector centrality measurements of skin virome-microbiome  
460 networks were calculated using a pairwise Wilcoxon test, corrected for multiple hypothesis tests using the  
461 Holm correction method. Multivariate eigenvector centrality was measured as the mean differences between  
462 cluster centroids, with statistical significance measured using an ANOVA and post hoc Tukey test.

## 463 **Acknowledgments**

464 We thank the members of the Schloss lab for their underlying contributions. We thank the authors of the  
465 original studies for making their data and metadata publicly available and understandable. We also thank  
466 the participants in the studies.

## 467 **Funding Information**

468 GDH was supported in part by the Molecular Mechanisms in Microbial Pathogenesis Training Program (T32  
469 AI007528). GDH and PDS were supported in part by funding from the NIH (P30DK034933, U19AI09087,  
470 and U01AI124255).

## 471 **Disclosure Declaration**

472 The authors report no conflicts of interest.

## 473 Figure Legends

**Figure 1: Summary of Multi-Study Network Model.** (A) Median ROC curve (dark red) used to create the microbiome-virome infection prediction model, based on nested cross validation over 25 random iterations. The maximum and minimum performance are shown in light red. (B) Importance scores associated with the metrics used in the random forest model to predict relationships between bacteria and phages. The importance score is defined as the mean decrease in accuracy of the model when a feature (e.g. Pfam) is excluded. Features include the local gene alignments between bacteria and phage genes (denoted *blastx*; the *blastx* algorithm in Diamond aligner), local genome nucleotide alignments between bacteria and phage OGUs, presence of experimentally validated protein family domains (Pfams) between phage and bacteria OGUs, and CRISPR targeting of bacteria toward phages (CRISPR). (C) Proportions of samples included (gray) and excluded (red) in the model. Samples were excluded from the model because they did not yield any scores. Those interactions without scores were automatically classified as not having interactions. (D) Bipartite visualization of the resulting phage-bacteria network. Phage OGUs are presented in orange, bacteria OGUs in red, and their interaction edges are represented as connecting lines. This network includes information from all three published studies. (E) Network diameter (measure of graph size; the greatest number of traversed vertices required between two vertices), (F) number of vertices, and (G) number of edges (relationships) for the total network (orange) and the individual study sub-networks (diet study = red, skin study = yellow, twin study = green).

**Figure 2: Impact of Diet and Obesity on Gut Network Structure.** (A) Quantification of average degree centrality (number of edges per node) and (B) closeness centrality (average distance from each node to every other node) of gut microbiome networks of subjects limited to exclusively high-fat or low-fat diets. Each point represents the centrality from a human subject stool sample that was collected 8-10 days following the beginning of their defined diet. There are five samples here, compared to the four in figure 3, because one of the was only sampled post-diet, providing us data for this analysis but not allowing us to compare to a baseline for figure 3. (C) Quantification of average degree centrality and (D) closeness centrality between obese and healthy adult women from the Twin gut study. Each point represents a stool sample taken from one of the three adult woman confirmed as obese or healthy and with matching virus and bacteria data.

**Figure 3: Intrapersonal vs Interpersonal Network Dissimilarity Across Different Human Systems.** (A) NMDS ordination illustrating network dissimilarity between subjects over time. Each sample is colored by subject, with each colored sample pair collected 8-10 days apart. Dissimilarity was calculated using the Bray-Curtis metric based on abundance weighted eigenvector centrality signatures, with a greater distance representing greater dissimilarity in bacteria and phage centrality and abundance. Only four subjects were included here, compared to the five used in figure 2, because one of the subjects was missing the initial sampling time point and therefore lacked temporal sampling. (B) Quantification of gut network dissimilarity within the same subject over time (intrapersonal) and the mean dissimilarity between the subject of interest and all other subjects (interpersonal). The p-value is provided near the bottom of the figure. (C) Quantification of gut network dissimilarity within subjects from the same family (intrafamily) and the mean dissimilarity between subjects within a family and those of other families (interfamily). Each point represents the inter-family and intra-family dissimilarity of a twin or mother that was sampled over time. (D) Quantification of skin network dissimilarity within the same subject and anatomical location over time (intrapersonal) and the mean dissimilarity between the subject of interest and all other subjects at the same time and the same anatomical location (interpersonal). All p-values were calculated using a paired Wilcoxon test.

**Figure 4: Impact of Skin Micro-Environment on Microbiome Network Structure.** (A) Notched box-plot depicting differences in average eigenvector centrality between moist, intermittently moist, and sebaceous skin sites and (B) occluded, intermittently occluded, and exposed sites. Notched box-plots were created using ggplot2 and show the median (center line), the inter-quartile range (IQR; upper and lower boxes), the highest and lowest value within  $1.5 * IQR$  (whiskers), outliers (dots), and the notch which provides an approximate 95% confidence interval as defined by  $1.58 * IQR / \sqrt{n}$ . Sample sizes for each group were: Moist = 81, Sebaceous = 56, IntMoist = 56, Occluded = 106, Exposed = 61, IntOccluded = 26. (C) NMDS ordination depicting the differences in skin microbiome network structure between skin moisture levels and (D) occlusion. Samples are colored by their environment and their dissimilarity to other samples was calculated as described in figure 3. (E) The statistical differences of networks between moisture and (F) occlusion status were quantified with an anova and post hoc Tukey test. Cluster centroids are represented by dots and the extended lines represent the associated 95% confidence intervals. Significant comparisons ( $p$ -value < 0.05) are colored in red, and non-significant comparisons are gray.



## 474 **Supplemental Figure Legends**

Figure S1: **Sequencing Depth Summary.** *Number of sequences that aligned to (A) Phage and (B) Bacteria operational genomic units per sample and colored by study.*

Figure S2: **Contig Summary Statistics.** *Scatter plot heat map with each hexagon representing the abundance of contigs. Contigs are organized by length on the x-axis and the number of aligned sequences on the y-axis.*

**Figure S3: Operational Genomic Unit Summary Statistics.** *Scatter plot with operational genomic unit clusters organized by average contig length within the cluster on the x-axis and the number of contigs in the cluster on the y-axis. Operational genomic units of (A) bacteriophages and (B) bacteria are shown.*

**Figure S4: Summary information of validation dataset used in the interaction predictive model.** *A) Categorical heat-map highlighting the experimentally validated positive and negative interactions. Only bacteria species are shown, which represent multiple reference strains. Phages are labeled on the x-axis and bacteria are labeled on the y-axis. B) Quantification of bacterial host strains known to exist for each phage. C) Genome strandedness and D) linearity of the phage reference genomes used for the dataset.*

**Figure S5: Structure of the interactive network.** *Metadata relationships to samples (Phage Sample ID and Bacteria Sample ID) included the associated time point, the study, the subject the sample was taken from, and the associated disease. Infectious interactions were recorded between phage and bacteria operational genomic units (OGUs). Sequence count abundance for each OGU within each sample was also recorded.*

**Figure S6: Intrapersonal vs Interpersonal Dissimilarity of the Skin.** *Quantification of skin network dissimilarity within the same subject and anatomical location over time (intrapersonal) and the mean dissimilarity between the subject of interest and all other subjects at the same time and the same anatomical location (interpersonal), separated by each anatomical site (forehead [Fh], palm [Pa], toe web [Tw], umbilicus [Um], antecubital fossa [Ac], axilla [Ax], and retroauricular crease [Ra]). P-value was calculated using a paired Wilcoxon test.*

## 475 **Supplemental Table Legend**

476 Table S1: Summary of the primary quality control measures reported in the original publications of the viromes  
477 used in this current study.

## 478 **References**

- 479 1. **Hannigan GD, Grice EA.** 2013. Microbial Ecology of the Skin in the Era of Metagenomics and Molecular  
480 Microbiology. *Cold Spring Harbor Perspectives in Medicine* **3**:a015362–a015362.
- 481 2. **Hannigan GD, Hodkinson BP, McGinnis K, Tyldsley AS, Anari JB, Horan AD, Grice EA, Mehta**  
482 **S.** 2014. Culture-independent pilot study of microbiota colonizing open fractures and association with  
483 severity, mechanism, location, and complication from presentation to early outpatient follow-up. *Journal of*  
484 *Orthopaedic Research* **32**:597–605.
- 485 3. **Loesche M, Gardner SE, Kalan L, Horwinski J, Zheng Q, Hodkinson BP, Tyldsley AS, Franciscus**  
486 **CL, Hillis SL, Mehta S, Margolis DJ, Grice EA.** 2016. Temporal stability in chronic wound microbiota is  
487 associated with poor healing. *Journal of Investigative Dermatology*.
- 488 4. **He Q, Li X, Liu C, Su L, Xia Z, Li X, Li Y, Li L, Yan T, Feng Q, Xiao L.** 2016. Dysbiosis of the fecal  
489 microbiota in the TNBS-induced Crohn's disease mouse model. *Applied Microbiology and Biotechnology*  
490 1–10.
- 491 5. **Norman JM, Handley SA, Baldrige MT, Droit L, Liu CY, Keller BC, Kambal A, Monaco CL, Zhao**  
492 **G, Fleshner P, Stappenbeck TS, McGovern DPB, Keshavarzian A, Mutlu EA, Sauk J, Gevers D, Xavier**  
493 **RJ, Wang D, Parkes M, Virgin HW.** 2015. Disease-specific alterations in the enteric virome in inflammatory  
494 bowel disease. *Cell* **160**:447–460.
- 495 6. **Seekatz AM, Rao K, Santhosh K, Young VB.** 2016. Dynamics of the fecal microbiome in patients with  
496 recurrent and nonrecurrent *Clostridium difficile* infection. *Genome medicine* **8**:47.
- 497 7. **Zackular JP, Rogers MAM, Ruffin MT, Schloss PD.** 2014. The human gut microbiome as a screening  
498 tool for colorectal cancer. *Cancer prevention research (Philadelphia, Pa)* **7**:1112–1121.
- 499 8. **Baxter NT, Zackular JP, Chen GY, Schloss PD.** 2014. Structure of the gut microbiome following  
500 colonization with human feces determines colonic tumor burden. *Microbiome* **2**:20.
- 501 9. **Manrique P, Bolduc B, Walk ST, Oost J van der, Vos WM de, Young MJ.** 2016. Healthy human gut



- 502 phageome. *Proceedings of the National Academy of Sciences of the United States of America* 201601060.
- 503 10. **Ly M, Abeles SR, Boehm TK, Robles-Sikisaka R, Naidu M, Santiago-Rodriguez T, Pride DT.** 2014.
- 504 *Altered Oral Viral Ecology in Association with Periodontal Disease.* *mBio* 5:e01133–14–e01133–14.
- 505 11. **Modi SR, Lee HH, Spina CS, Collins JJ.** 2013. Antibiotic treatment expands the resistance reservoir
- 506 and ecological network of the phage metagenome. *Nature* 499:219–222.
- 507 12. **Monaco CL, Gootenberg DB, Zhao G, Handley SA, Ghebremichael MS, Lim ES, Lankowski A,**
- 508 **Baldrige MT, Wilen CB, Flagg M, Norman JM, Keller BC, Luévano JM, Wang D, Boum Y, Martin JN, Hunt**
- 509 **PW, Bangsberg DR, Siedner MJ, Kwon DS, Virgin HW.** 2016. Altered Virome and Bacterial Microbiome in
- 510 Human Immunodeficiency Virus-Associated Acquired Immunodeficiency Syndrome. *Cell Host and Microbe*
- 511 19:311–322.
- 512 13. **Hannigan GD, Meisel JS, Tyldsley AS, Zheng Q, Hodgkinson BP, SanMiguel AJ, Minot S, Bushman**
- 513 **FD, Grice EA.** 2015. The Human Skin Double-Stranded DNA Virome: Topographical and Temporal Diversity,
- 514 Genetic Enrichment, and Dynamic Associations with the Host Microbiome. *mBio* 6:e01578–15.
- 515 14. **Minot S, Sinha R, Chen J, Li H, Keilbaugh SA, Wu GD, Lewis JD, Bushman FD.** 2011. The human
- 516 gut virome: Inter-individual variation and dynamic response to diet. *Genome Research* 21:1616–1625.
- 517 15. **Santiago-Rodriguez TM, Ly M, Bonilla N, Pride DT.** 2015. The human urine virome in association with
- 518 urinary tract infections. *Frontiers in Microbiology* 6:14.
- 519 16. **Abeles SR, Ly M, Santiago-Rodriguez TM, Pride DT.** 2015. Effects of Long Term Antibiotic Therapy on
- 520 Human Oral and Fecal Viromes. *PLOS ONE* 10:e0134941.
- 521 17. **Abeles SR, Robles-Sikisaka R, Ly M, Lum AG, Salzman J, Boehm TK, Pride DT.** 2014. Human oral
- 522 viruses are personal, persistent and gender-consistent 1–15.
- 523 18. **Haerter JO, Mitarai N, Sneppen K.** 2014. Phage and bacteria support mutual diversity in a narrowing
- 524 staircase of coexistence. *The ISME Journal* 8:2317–2326.
- 525 19. **Lindell D, Jaffe JD, Johnson ZI, Church GM, Chisholm SW.** 2005. Photosynthesis genes in marine

- 526 viruses yield proteins during host infection. *Nature* **438**:86–89.
- 527 20. **Tyler JS, Beeri K, Reynolds JL, Alteri CJ, Skinner KG, Friedman JH, Eaton KA, Friedman DI.** 2013.  
528 Prophage induction is enhanced and required for renal disease and lethality in an EHEC mouse model. *PLoS*  
529 *Pathogens* **9**:e1003236.
- 530 21. **Hargreaves KR, Kropinski AM, Clokie MR.** 2014. Bacteriophage behavioral ecology: How phages alter  
531 their bacterial host's habits. *Bacteriophage* **4**:e29866.
- 532 22. **Moon BY, Park JY, Hwang SY, Robinson DA, Thomas JC, Fitzgerald JR, Park YH, Seo KS.** 2015.  
533 Phage-mediated horizontal transfer of a *Staphylococcus aureus* virulence-associated genomic island.  
534 *Scientific Reports* **5**:9784.
- 535 23. **Modi SR, Lee HH, Spina CS, Collins JJ.** 2013. Antibiotic treatment expands the resistance reservoir  
536 and ecological network of the phage metagenome. *Nature* **499**:219–222.
- 537 24. **Ogg JE, Timme TL, Alemohammad MM.** 1981. General Transduction in *Vibrio cholerae*. *Infection and*  
538 *Immunity* **31**:737–741.
- 539 25. **Frost LS, Leplae R, Summers AO, Toussaint A.** 2005. Mobile genetic elements: the agents of open  
540 source evolution. *Nature Reviews Microbiology* **3**:722–732.
- 541 26. **Koskella B, Brockhurst MA.** 2014. Bacteria-phage coevolution as a driver of ecological and evolutionary  
542 processes in microbial communities. *FEMS Microbiology Reviews* **38**:916–931.
- 543 27. **Jover LF, Effler TC, Buchan A, Wilhelm SW, Weitz JS.** 2014. The elemental composition of virus  
544 particles: implications for marine biogeochemical cycles. *Nature Reviews Microbiology* **12**:519–528.
- 545 28. **Harcombe WR, Bull JJ.** 2005. Impact of phages on two-species bacterial communities. *Applied and*  
546 *Environmental Microbiology* **71**:5254–5259.
- 547 29. **Middelboe M, Hagström A, Blackburn N, Sinn B, Fischer U, Borch NH, Pinhassi J, Simu K, Lorenz**  
548 **MG.** 2001. Effects of Bacteriophages on the Population Dynamics of Four Strains of Pelagic Marine Bacteria.

549 Microbial Ecology **42**:395–406.

550 30. **Poisot T, Lepennetier G, Martinez E, Ramsayer J, Hochberg ME.** 2011. Resource availability affects  
551 the structure of a natural bacteriophage community. *Biology letters* **7**:201–204.

552 31. **Thompson RM, Brose U, Dunne JA, Hall RO, Hladyz S, Kitching RL, Martinez ND, Rantala H,**  
553 **Romanuk TN, Stouffer DB, Tylianakis JM.** 2012. Food webs: reconciling the structure and function of  
554 biodiversity. *Trends in ecology & evolution* **27**:689–697.

555 32. **Moebus K, Nattkemper H.** 1981. Bacteriophage sensitivity patterns among bacteria isolated from marine  
556 waters. *Helgoländer Meeresuntersuchungen* **34**:375–385.

557 33. **Flores CO, Valverde S, Weitz JS.** 2013. Multi-scale structure and geographic drivers of cross-infection  
558 within marine bacteria and phages. *The ISME Journal* **7**:520–532.

559 34. **Poisot T, Canard E, Mouillot D, Mouquet N, Gravel D.** 2012. The dissimilarity of species interaction  
560 networks. *Ecology letters* **15**:1353–1361.

561 35. **Poisot T, Stouffer D.** 2016. How ecological networks evolve. *bioRxiv*.

562 36. **Flores CO, Meyer JR, Valverde S, Farr L, Weitz JS.** 2011. Statistical structure of host-phage interactions.  
563 *Proceedings of the National Academy of Sciences of the United States of America* **108**:E288–97.

564 37. **Jover LF, Flores CO, Cortez MH, Weitz JS.** 2015. Multiple regimes of robust patterns between network  
565 structure and biodiversity. *Scientific Reports* **5**:17856.

566 38. **Reyes A, Haynes M, Hanson N, Angly FE, Heath AC, Rohwer F, Gordon JI.** 2010. Viruses in the  
567 faecal microbiota of monozygotic twins and their mothers. *Nature* **466**:334–338.

568 39. **Turnbaugh PJ, Hamady M, Yatsunencko T, Cantarel BL, Duncan A, Ley RE, Sogin ML, Jones WJ, Roe**  
569 **BA, Affourtit JP, Egholm M, Henrissat B, Heath AC, Knight R, Gordon JI.** 2009. A core gut microbiome  
570 in obese and lean twins. *Nature* **457**:480–484.

571 40. **Lima-Mendez G, Faust K, Henry N, Decelle J, Colin S, Carcillo F, Chaffron S, Ignacio-Espinosa JC,**  
572 **Roux S, Vincent F, Bittner L, Darzi Y, Wang J, Audic S, Berline L, Bontempi G, Cabello AM, Coppola**

- 573 **L, Cornejo-Castillo FM, d'Ovidio F, De Meester L, Ferrera I, Garet-Delmas M-J, Guidi L, Lara E, Pesant**  
574 **S, Royo-Llonch M, Salazar G, Sánchez P, Sebastian M, Souffreau C, Dimier C, Picheral M, Searson**  
575 **S, Kandels-Lewis S, Tara Oceans Coordinators, Gorsky G, Not F, Ogata H, Speich S, Stemmann**  
576 **L, Weissenbach J, Wincker P, Acinas SG, Sunagawa S, Bork P, Sullivan MB, Karsenti E, Bowler C,**  
577 **Vargas C de, Raes J.** 2015. Ocean plankton. Determinants of community structure in the global plankton  
578 interactome. *Science* **348**:1262073–1262073.
- 579 41. **Edwards RA, McNair K, Faust K, Raes J, Dutilh BE.** 2015. Computational approaches to predict  
580 bacteriophage-host relationships. *FEMS Microbiology Reviews* **40**:258–272.
- 581 42. **Roux S, Brum JR, Dutilh BE, Sunagawa S, Duhaime MB, Loy A, Poulos BT, Solonenko N, Lara E,**  
582 **Poulain J, Pesant S, Kandels-Lewis S, Dimier C, Picheral M, Searson S, Cruaud C, Alberti A, Duarte**  
583 **CM, Gasol JM, Vaqué D, Tara Oceans Coordinators, Bork P, Acinas SG, Wincker P, Sullivan MB.**  
584 2016. Ecogenomics and potential biogeochemical impacts of globally abundant ocean viruses. *Nature*  
585 **537**:689–693.
- 586 43. **Grice EA, Kong HH, Conlan S, Deming CB, Davis J, Young AC, NISC Comparative Sequencing**  
587 **Program, Bouffard GG, Blakesley RW, Murray PR, Green ED, Turner ML, Segre JA.** 2009. Topographical  
588 and Temporal Diversity of the Human Skin Microbiome. *Science* **324**:1190–1192.
- 589 44. **Findley K, Oh J, Yang J, Conlan S, Deming C, Meyer JA, Schoenfeld D, Nomicos E, Park M,**  
590 **NIH Intramural Sequencing Center Comparative Sequencing Program, Kong HH, Segre JA.** 2013.  
591 Topographic diversity of fungal and bacterial communities in human skin. *Nature* 1–6.
- 592 45. **Costello EK, Lauber CL, Hamady M, Fierer N, Gordon JI, Knight R.** 2009. Bacterial community  
593 variation in human body habitats across space and time. *Science* **326**:1694–1697.
- 594 46. **Consortium THMP.** 2012. A framework for human microbiome research. *Nature* **486**:215–221.
- 595 47. **Roux S, Enault F, Hurwitz BL, Sullivan MB.** 2015. VirSorter: mining viral signal from microbial genomic  
596 data. *PeerJ* **3**:e985–20.
- 597 48. **Jensen EC, Schrader HS, Rieland B, Thompson TL, Lee KW, Nickerson KW, Kokjohn TA.**

- 598 1998. Prevalence of broad-host-range lytic bacteriophages of *Sphaerotilus natans*, *Escherichia coli*, and  
599 *Pseudomonas aeruginosa*. *Applied and Environmental Microbiology* **64**:575–580.
- 600 49. **Malki K, Kula A, Bruder K, Sible E.** 2015. Bacteriophages isolated from Lake Michigan demonstrate  
601 broad host-range across several bacterial phyla. *Virology*.
- 602 50. **Schwarzer D, Buettner FFR, Browning C, Nazarov S, Rabsch W, Bethe A, Oberbeck A, Bowman VD,**  
603 **Stummeyer K, Mühlenhoff M, Leiman PG, Gerardy-Schahn R.** 2012. A multivalent adsorption apparatus  
604 explains the broad host range of phage phi92: a comprehensive genomic and structural analysis. *Journal of*  
605 *Virology* **86**:10384–10398.
- 606 51. **Kim S, Rahman M, Seol SY, Yoon SS, Kim J.** 2012. *Pseudomonas aeruginosa* bacteriophage PA1Ø  
607 requires type IV pili for infection and shows broad bactericidal and biofilm removal activities. *Applied and*  
608 *Environmental Microbiology* **78**:6380–6385.
- 609 52. **Matsuzaki S, Tanaka S, Koga T, Kawata T.** 1992. A Broad-Host-Range Vibriophage, KVP40, Isolated  
610 from Sea Water. *Microbiology and Immunology* **36**:93–97.
- 611 53. **Orchard S, Ammari M, Aranda B, Breuza L, Briganti L, Broackes-Carter F, Campbell NH, Chavali**  
612 **G, Chen C, del-Toro N, Duesbury M, Dumousseau M, Galeota E, Hinz U, Iannuccelli M, Jagannathan S,**  
613 **Jimenez R, Khadake J, Lagreid A, Licata L, Lovering RC, Meldal B, Melidoni AN, Milagros M, Peluso**  
614 **D, Perfetto L, Porras P, Raghunath A, Ricard-Blum S, Roechert B, Stutz A, Tognolli M, Roey K van,**  
615 **Cesareni G, Hermjakob H.** 2014. The MIntAct project–IntAct as a common curation platform for 11 molecular  
616 interaction databases. *Nucleic Acids Research* **42**:D358–63.
- 617 54. **Kleiner M, Hooper LV, Duerkop BA.** 2015. Evaluation of methods to purify virus-like particles for  
618 metagenomic sequencing of intestinal viromes. *BMC Genomics* **16**:7.
- 619 55. **Meisel JS, Hannigan GD, Tyldsley AS, SanMiguel AJ, Hodkinson BP, Zheng Q, Grice EA.** 2016. Skin  
620 microbiome surveys are strongly influenced by experimental design. *Journal of Investigative Dermatology*.
- 621 56. **Turnbaugh PJ, Ridaura VK, Faith JJ, Rey FE, Knight R, Gordon JI.** 2009. The effect of diet on  
622 the human gut microbiome: a metagenomic analysis in humanized gnotobiotic mice. *Science Translational*

623 *Medicine* 1:6ra14–6ra14.

624 57. **David LA, Maurice CF, Carmody RN, Gootenberg DB, Button JE, Wolfe BE, Ling AV, Devlin AS,**  
625 **Varma Y, Fischbach MA, Biddinger SB, Dutton RJ, Turnbaugh PJ.** 2014. Diet rapidly and reproducibly  
626 alters the human gut microbiome. *Nature* 505:559–563.

627 58. **Jeong H, Tombor B, Albert R, Oltvai ZN, Barabási AL.** 2000. The large-scale organization of metabolic  
628 networks. *Nature* 407:651–654.

629 59. **Grice EA, Kong HH, Conlan S, Deming CB, Davis J, Young AC, NISC Comparative Sequencing**  
630 **Program, Bouffard GG, Blakesley RW, Murray PR, Green ED, Turner ML, Segre JA.** 2009. Topographical  
631 and Temporal Diversity of the Human Skin Microbiome. *Science* 324:1190–1192.

632 60. **Minot S, Bryson A, Chehoud C, Wu GD, Lewis JD, Bushman FD.** 2013. Rapid evolution of the  
633 human gut virome. *Proceedings of the National Academy of Sciences of the United States of America*  
634 110:12450–12455.

635 61. **Schloss PD, Handelsman J.** 2005. Introducing DOTUR, a computer program for defining operational  
636 taxonomic units and estimating species richness. *Applied and Environmental Microbiology* 71:1501–1506.

637 62. **Yilmaz S, Allgaier M, Hugenholtz P.** 2010. Multiple displacement amplification compromises  
638 quantitative analysis of metagenomes. *Nature Methods* 7:943–944.

639 63. **Kim KH, Chang HW, Nam YD, Roh SW.** 2008. Amplification of uncultured single-stranded DNA viruses  
640 from rice paddy soil. *Applied and ....*

641 64. **Kim K-H, Bae J-W.** 2011. Amplification methods bias metagenomic libraries of uncultured  
642 single-stranded and double-stranded DNA viruses. *Applied and Environmental Microbiology* 77:7663–7668.

643 65. **Minot S, Wu GD, Lewis JD, Bushman FD.** 2012. Conservation of gene cassettes among diverse viruses  
644 of the human gut. *PLOS ONE* 7:e42342.

645 66. **Deng L, Ignacio-Espinoza JC, Gregory AC, Poulos BT, Weitz JS, Hugenholtz P, Sullivan MB.**  
646 2014. Viral tagging reveals discrete populations in *Synechococcus* viral genome sequence space. *Nature*

647 **513:242–245.**

648 **67. Brum JR, Ignacio-Espinoza JC, Roux S, Doulcier G, Acinas SG, Alberti A, Chaffron S, Cruaud C,**  
649 **Vargas C de, Gasol JM, Gorsky G, Gregory AC, Guidi L, Hingamp P, Iudicone D, Not F, Ogata H, Pesant**  
650 **S, Poulos BT, Schwenck SM, Speich S, Dimier C, Kandels-Lewis S, Picheral M, Searson S, Tara Oceans**  
651 **Coordinators, Bork P, Bowler C, Sunagawa S, Wincker P, Karsenti E, Sullivan MB.** 2015. Ocean plankton.  
652 Patterns and ecological drivers of ocean viral communities. *Science* **348**:1261498–1261498.

653 **68. Malki K, Kula A, Bruder K, Sible E, Hatzopoulos T, Steidel S, Watkins SC, Putonti C.** 2015.  
654 Bacteriophages isolated from Lake Michigan demonstrate broad host-range across several bacterial phyla.  
655 *Virology Journal* **12**:164.

656 **69. Polz MF, Hunt DE, Preheim SP, Weinreich DM.** 2006. Patterns and mechanisms of genetic and  
657 phenotypic differentiation in marine microbes. *Philosophical Transactions of the Royal Society B: Biological*  
658 *Sciences* **361**:2009–2021.

659 **70. Gregory AC, Solonenko SA, Ignacio-Espinoza JC, LaButti K, Copeland A, Sudek S, Maitland A,**  
660 **Chittick L, Dos Santos F, Weitz JS, Worden AZ, Woyke T, Sullivan MB.** 2016. Genomic differentiation  
661 among wild cyanophages despite widespread horizontal gene transfer. *BMC Genomics* **17**:930.

662 **71. Paez-Espino D, Eloe-Fadrosh EA, Pavlopoulos GA, Thomas AD, Huntemann M, Mikhailova N, Rubin**  
663 **E, Ivanova NN, Kyrpides NC.** 2016. Uncovering Earth's virome. *Nature*.

664 **72. Grice EA, Segre JA.** 2011. The skin microbiome. *Nature Reviews Microbiology* **9**:244–253.

665 **73. Round JL, Mazmanian SK.** 2009. The gut microbiota shapes intestinal immune responses during health  
666 and disease. *Nature reviews Immunology* **9**:313–323.

667 **74. Hannon GJ.** FASTX-Toolkit GNU Affero General Public License.

668 **75. Li D, Luo R, Liu C-M, Leung C-M, Ting H-F, Sadakane K, Yamashita H, Lam T-W.** 2016. MEGAHIT v1.0:  
669 A fast and scalable metagenome assembler driven by advanced methodologies and community practices.

670 METHODS 102:3–11.

671 76. **Langmead B, Salzberg SL.** 2012. Fast gapped-read alignment with Bowtie 2. *Nature Methods*  
672 **9**:357–359.

673 77. **Alneberg J, Bjarnason BS, Kristiansen K, Rasmussen S, Brunak S, et al.** 2014. Binning metagenomic contigs by coverage and composition. *Nature*  
674 **NJ, Andersson AF, Quince C.** 2014. Binning metagenomic contigs by coverage and composition. *Nature*  
675 *Methods* 1–7.

676 78. **Hyatt D, LoCascio PF, Hauser LJ, Uberbacher EC.** 2012. Gene and translation initiation site prediction  
677 in metagenomic sequences. *Bioinformatics* **28**:2223–2230.

678 79. **Kuhn M.** caret: Classification and Regression Training.

679 80. **Edgar RC.** 2007. PILER-CR: fast and accurate identification of CRISPR repeats. *BMC Bioinformatics*  
680 **8**:18.

681 81. **Camacho C, Coulouris G, Avagyan V, Ma N, Papadopoulos J, Bealer K, Madden TL.** 2009. BLAST+:  
682 architecture and applications. *BMC Bioinformatics* **10**:1.

683 82. **Buchfink B, Xie C, Huson DH.** 2015. Fast and sensitive protein alignment using DIAMOND. *Nature*  
684 *Methods* **12**:59–60.

685 83. Neo4j.

686 84. **Csardi G, Nepusz T.** The igraph software package for complex network research.



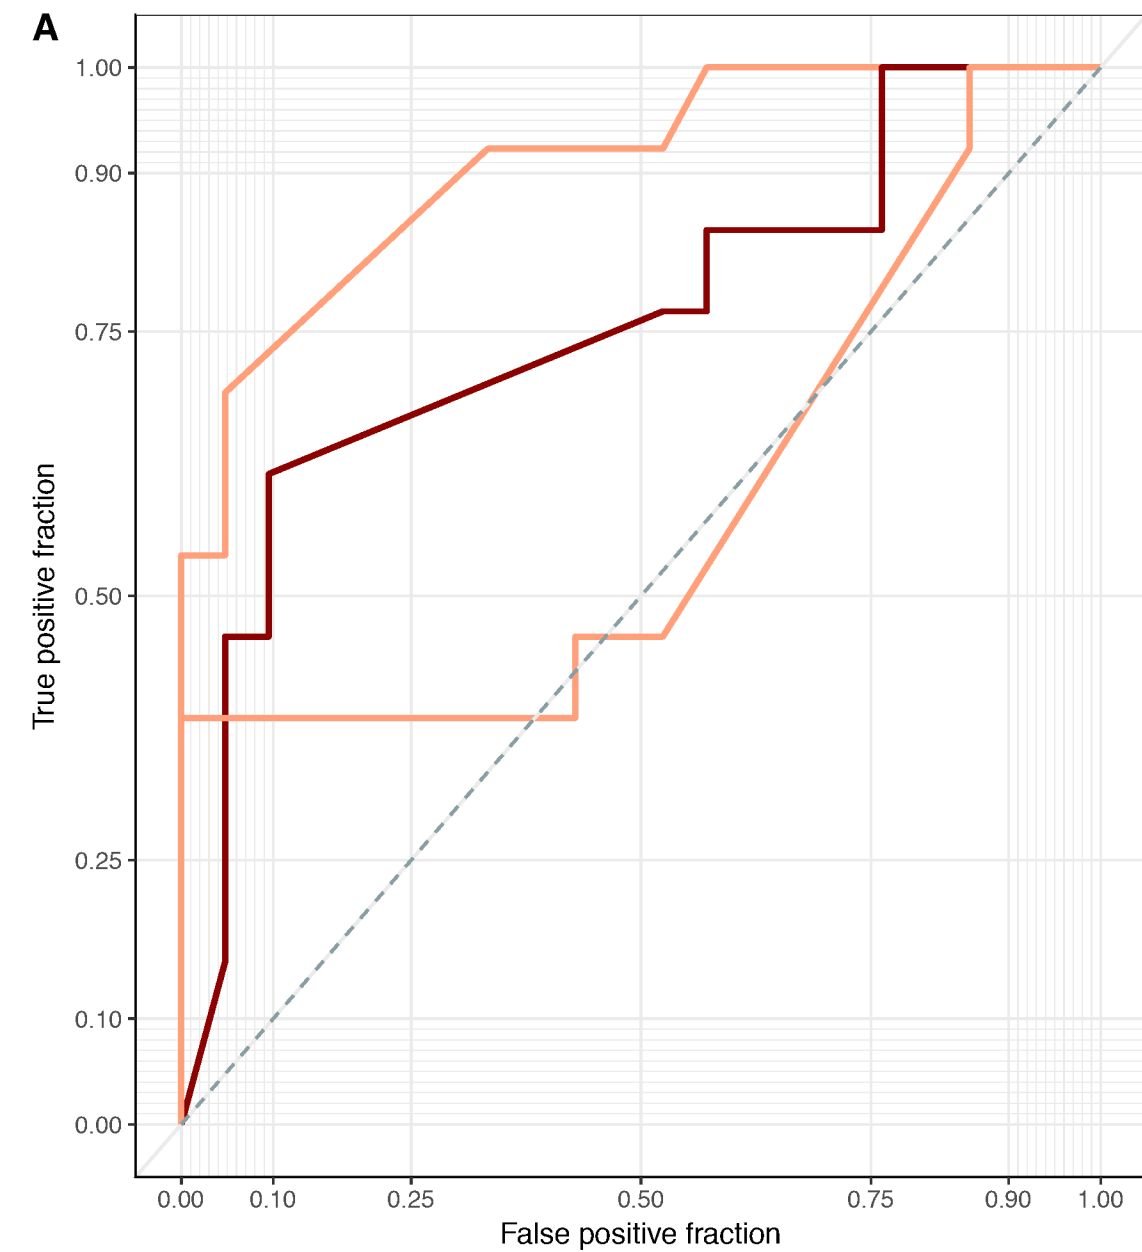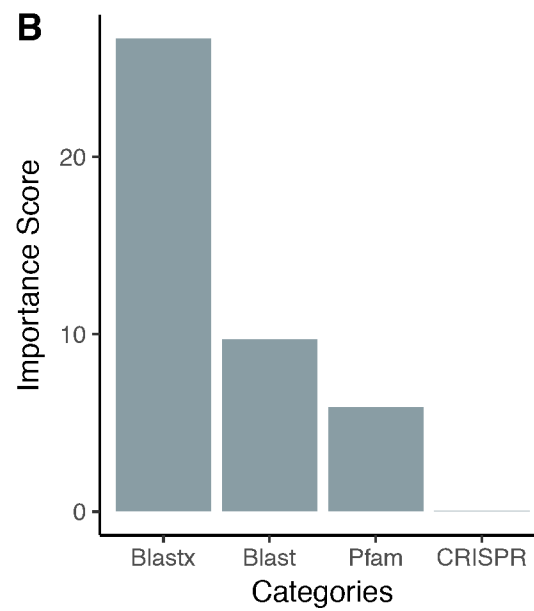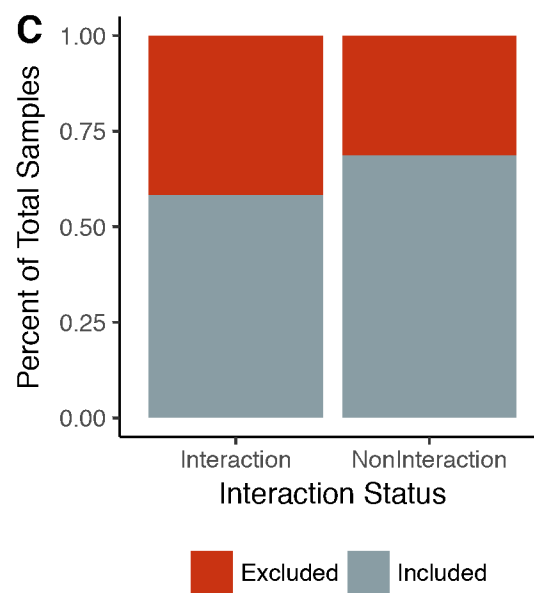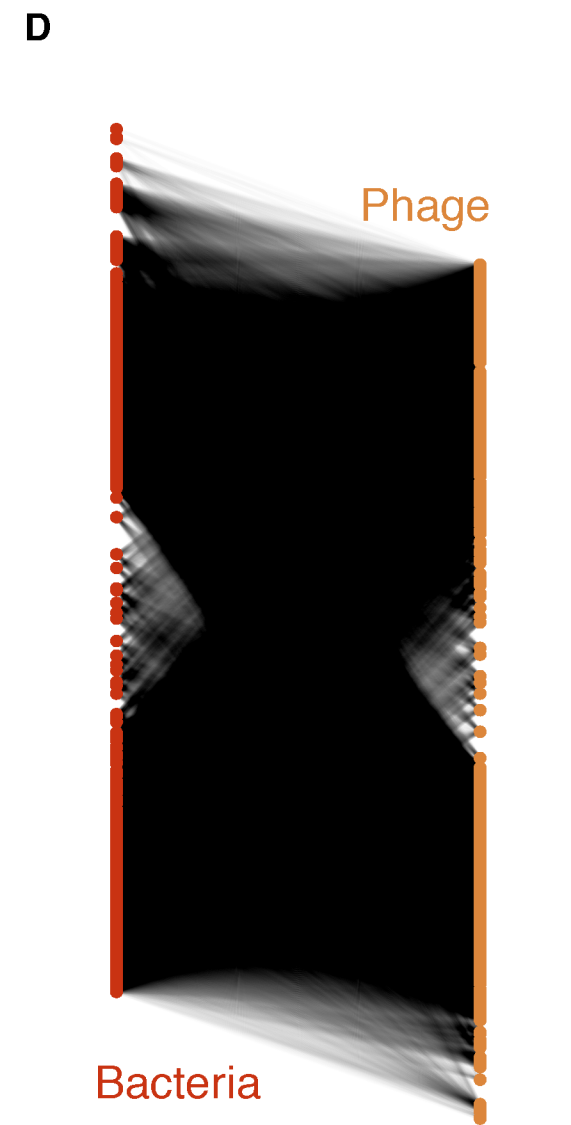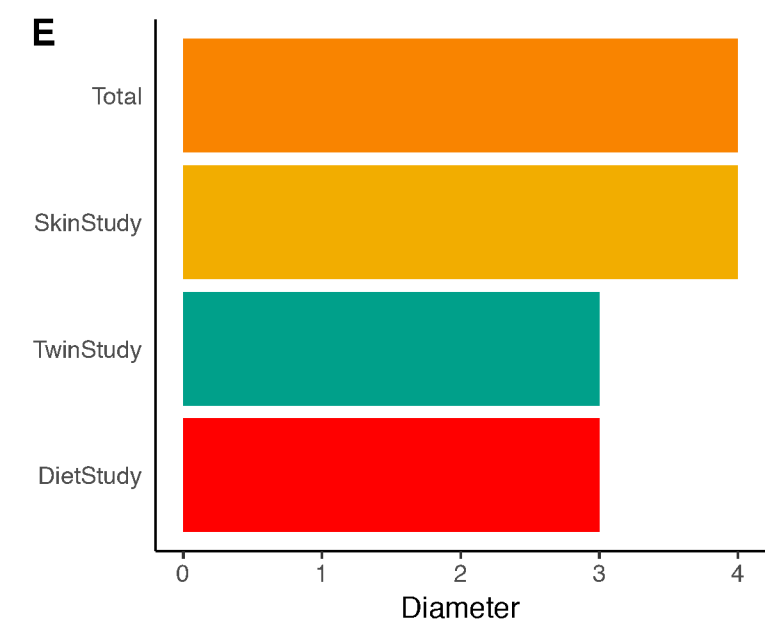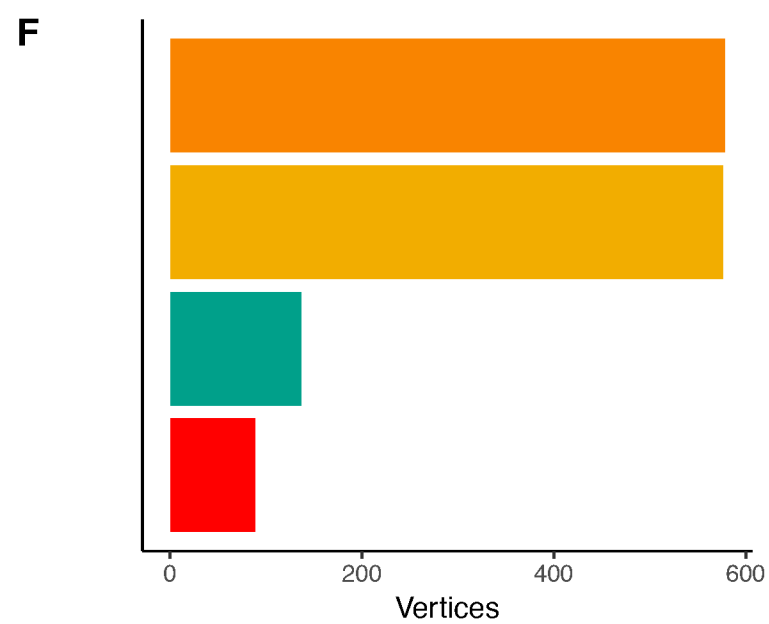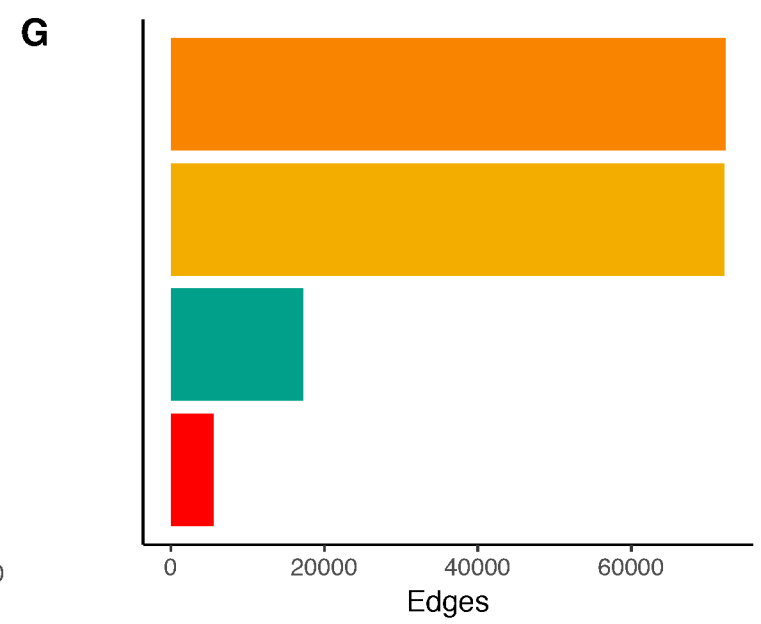

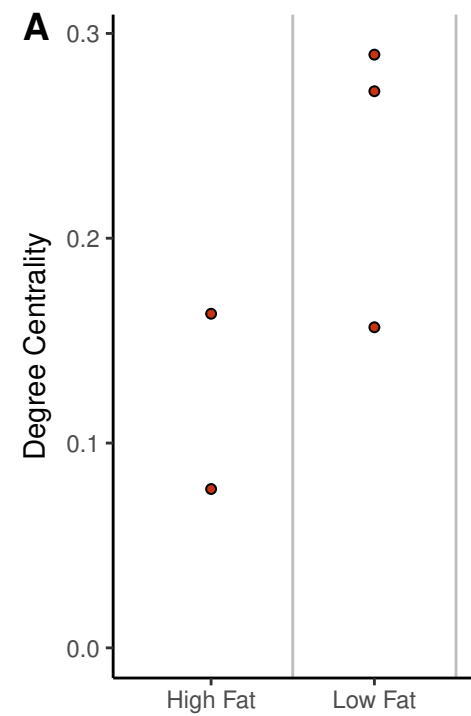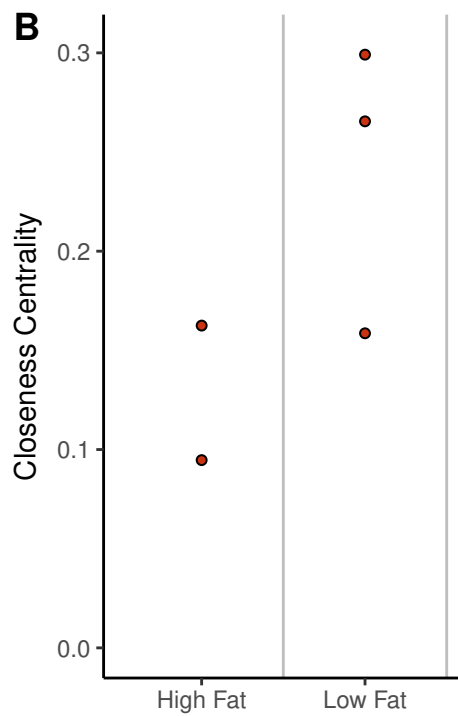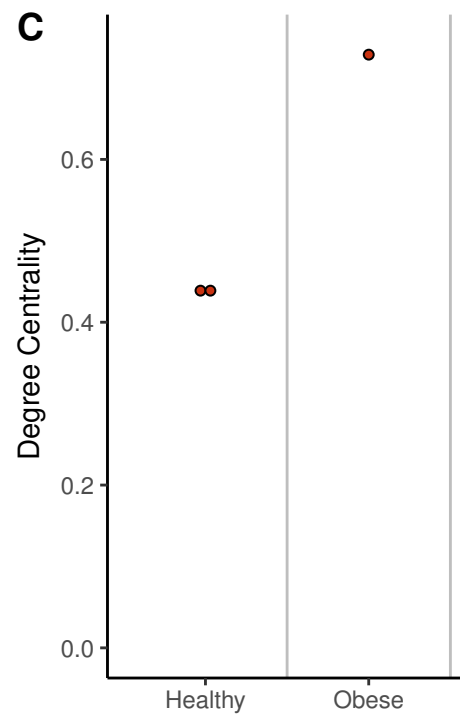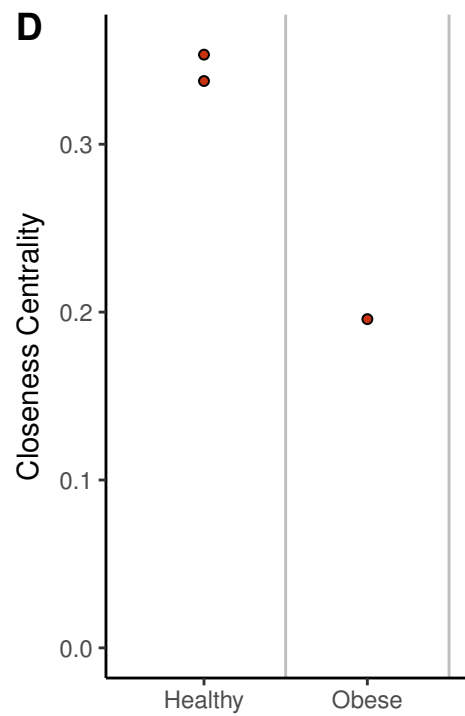

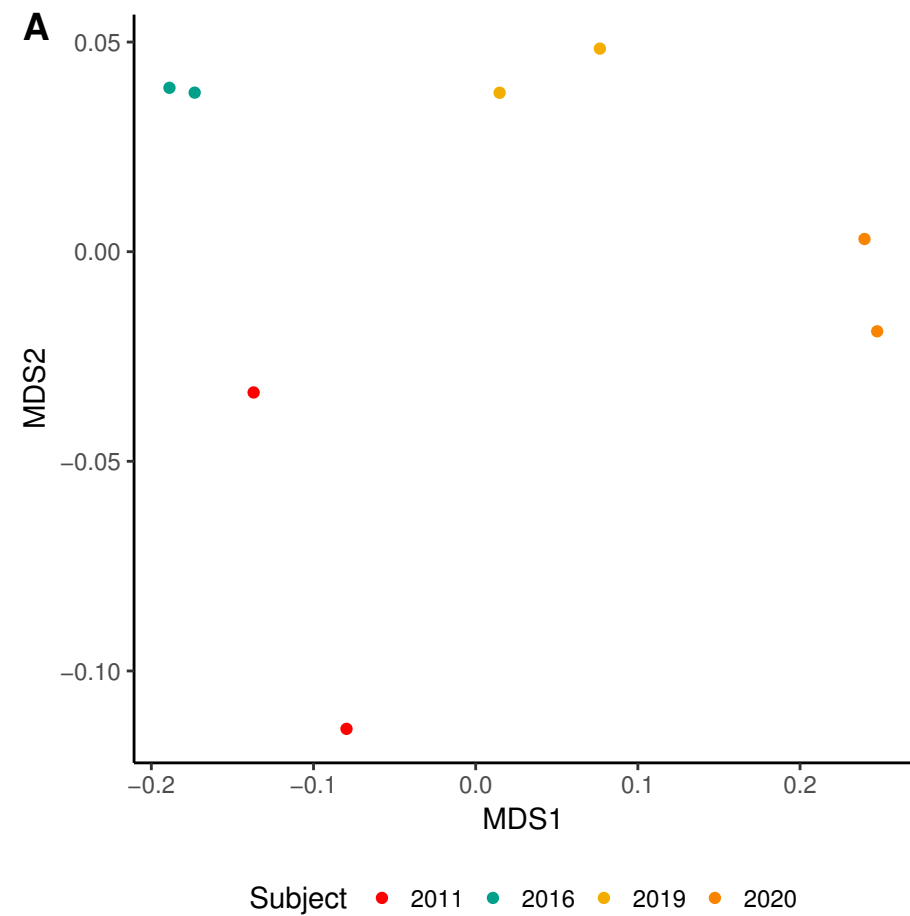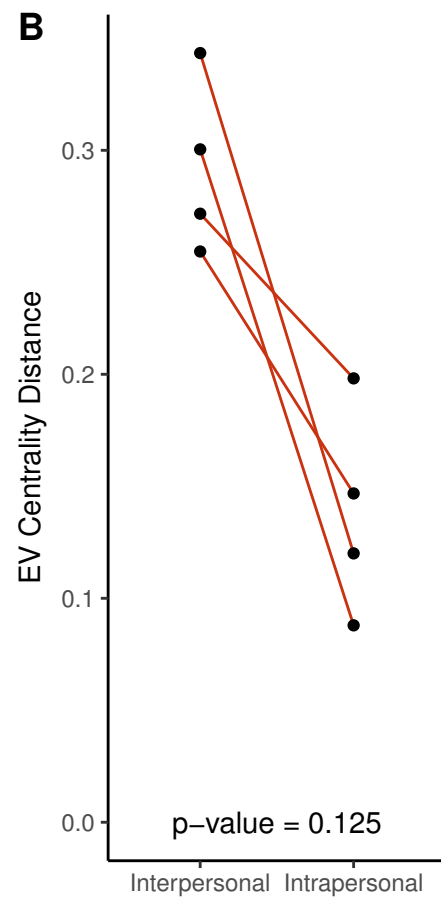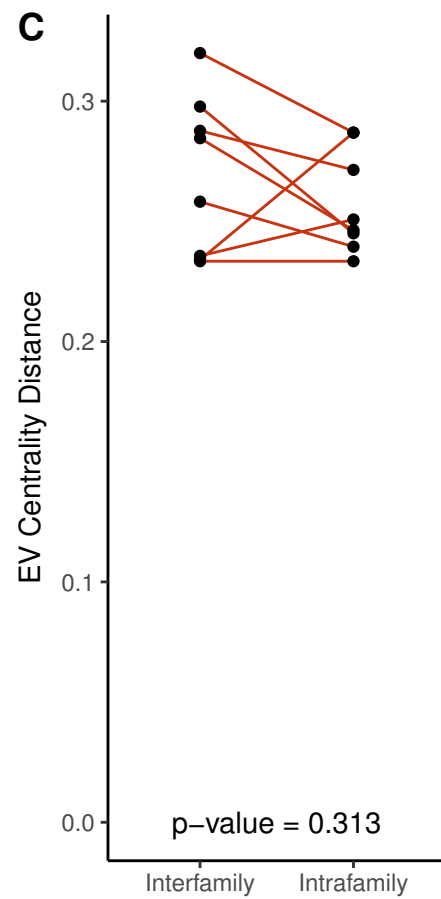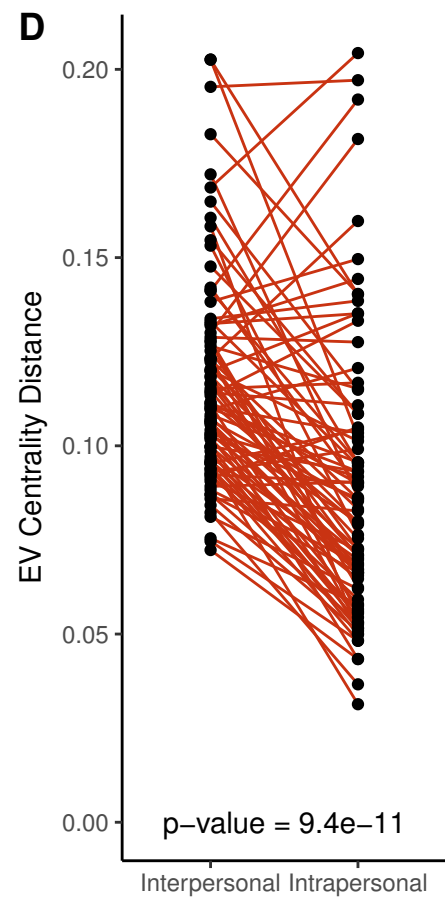

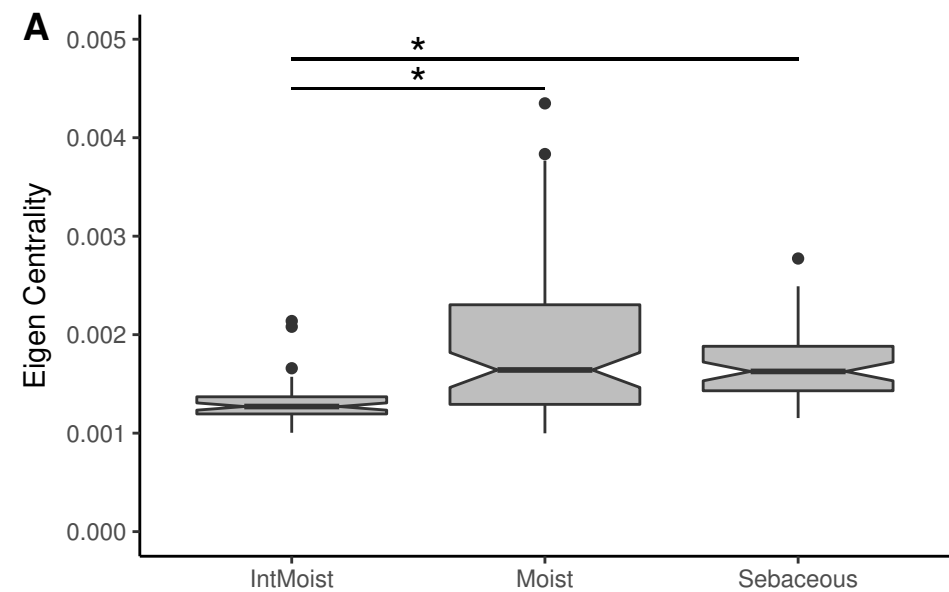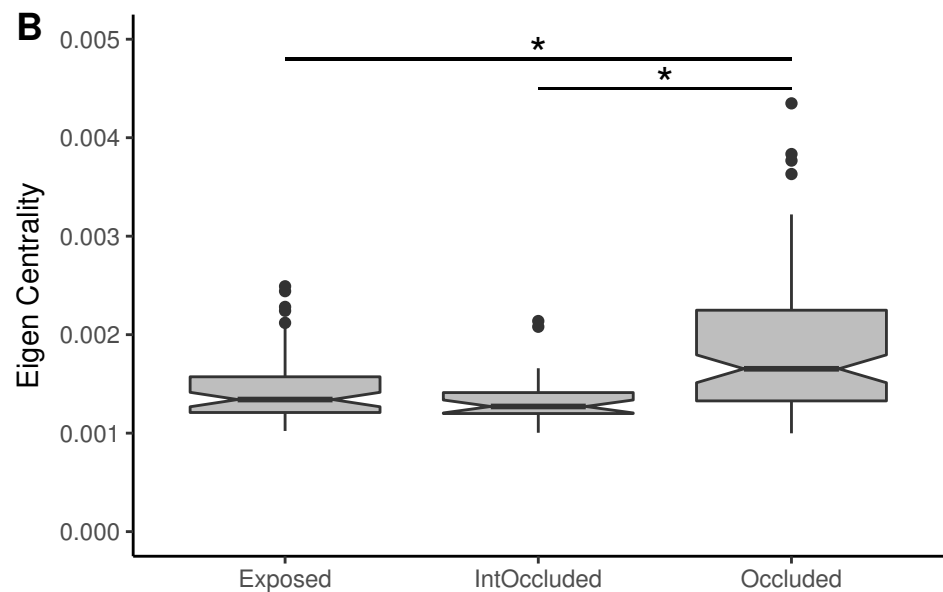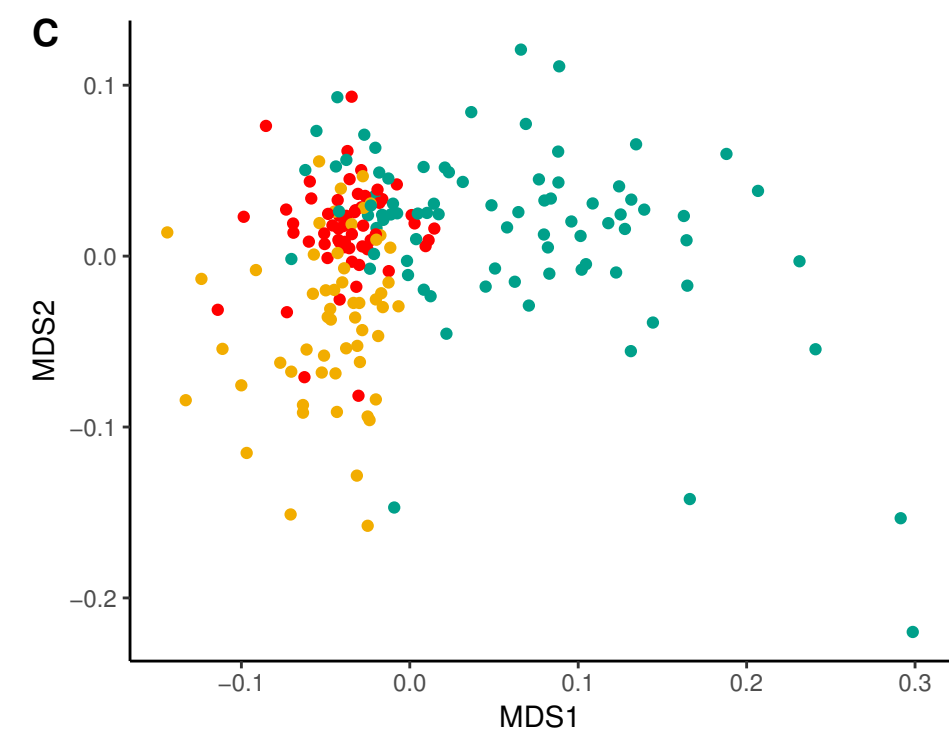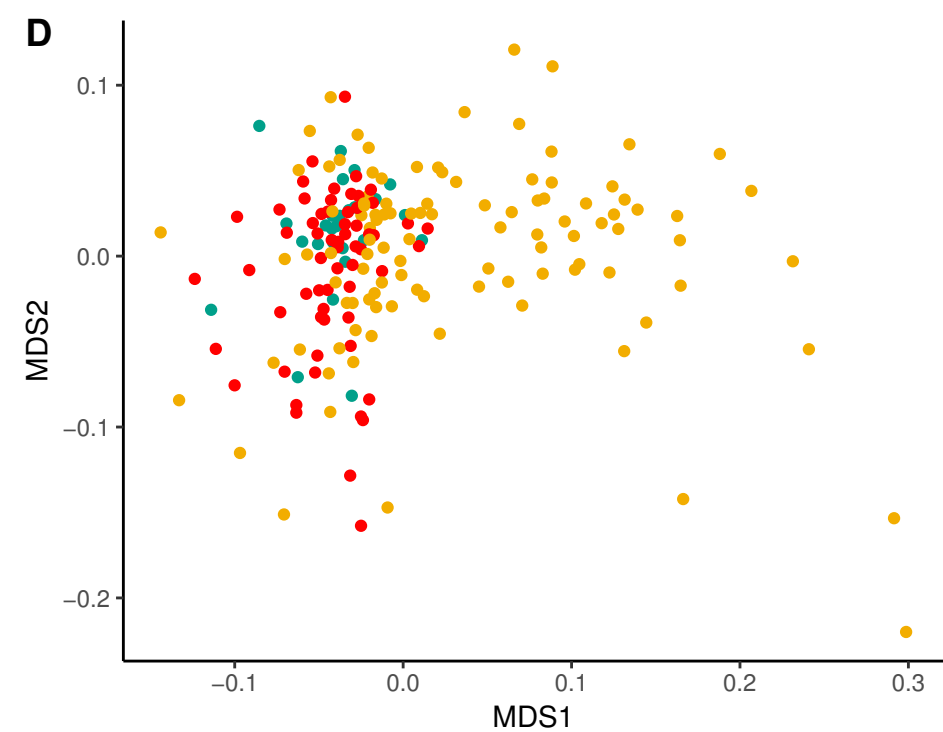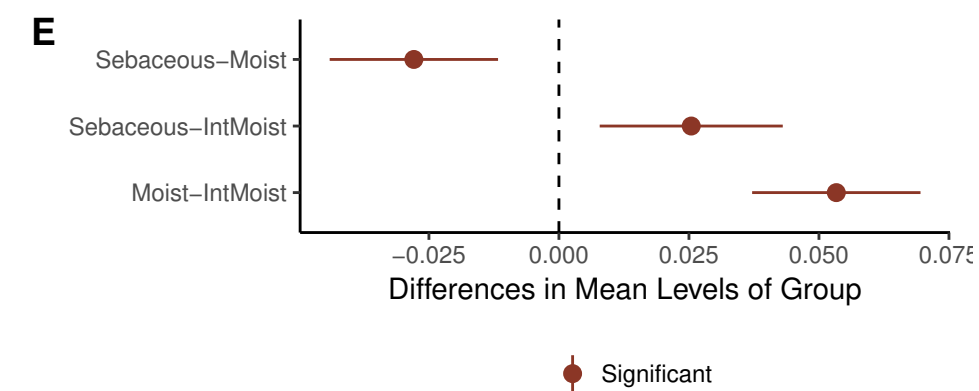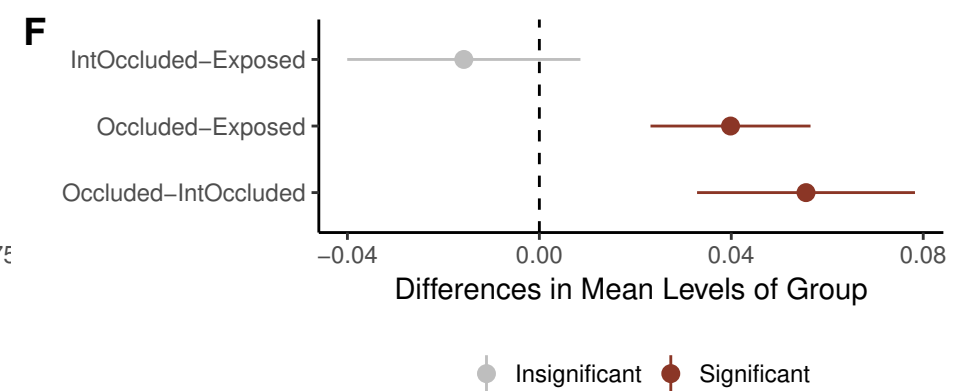

Source: http://www.biorxiv.org/content/10.1101/144642v2.full.pdf
